# Supplementary material for: α-Synuclein fibril-induced paradoxical structural and functional defects in hippocampal neurons
Source: PubMed Central journal article supplement (PMC5928584; doi:10.1186/s40478-018-0537-x), 2018-05-01
Supplement: 40478_2018_537_MOESM2_ESM.pdf [file 40478_2018_537_MOESM2_ESM.pdf]

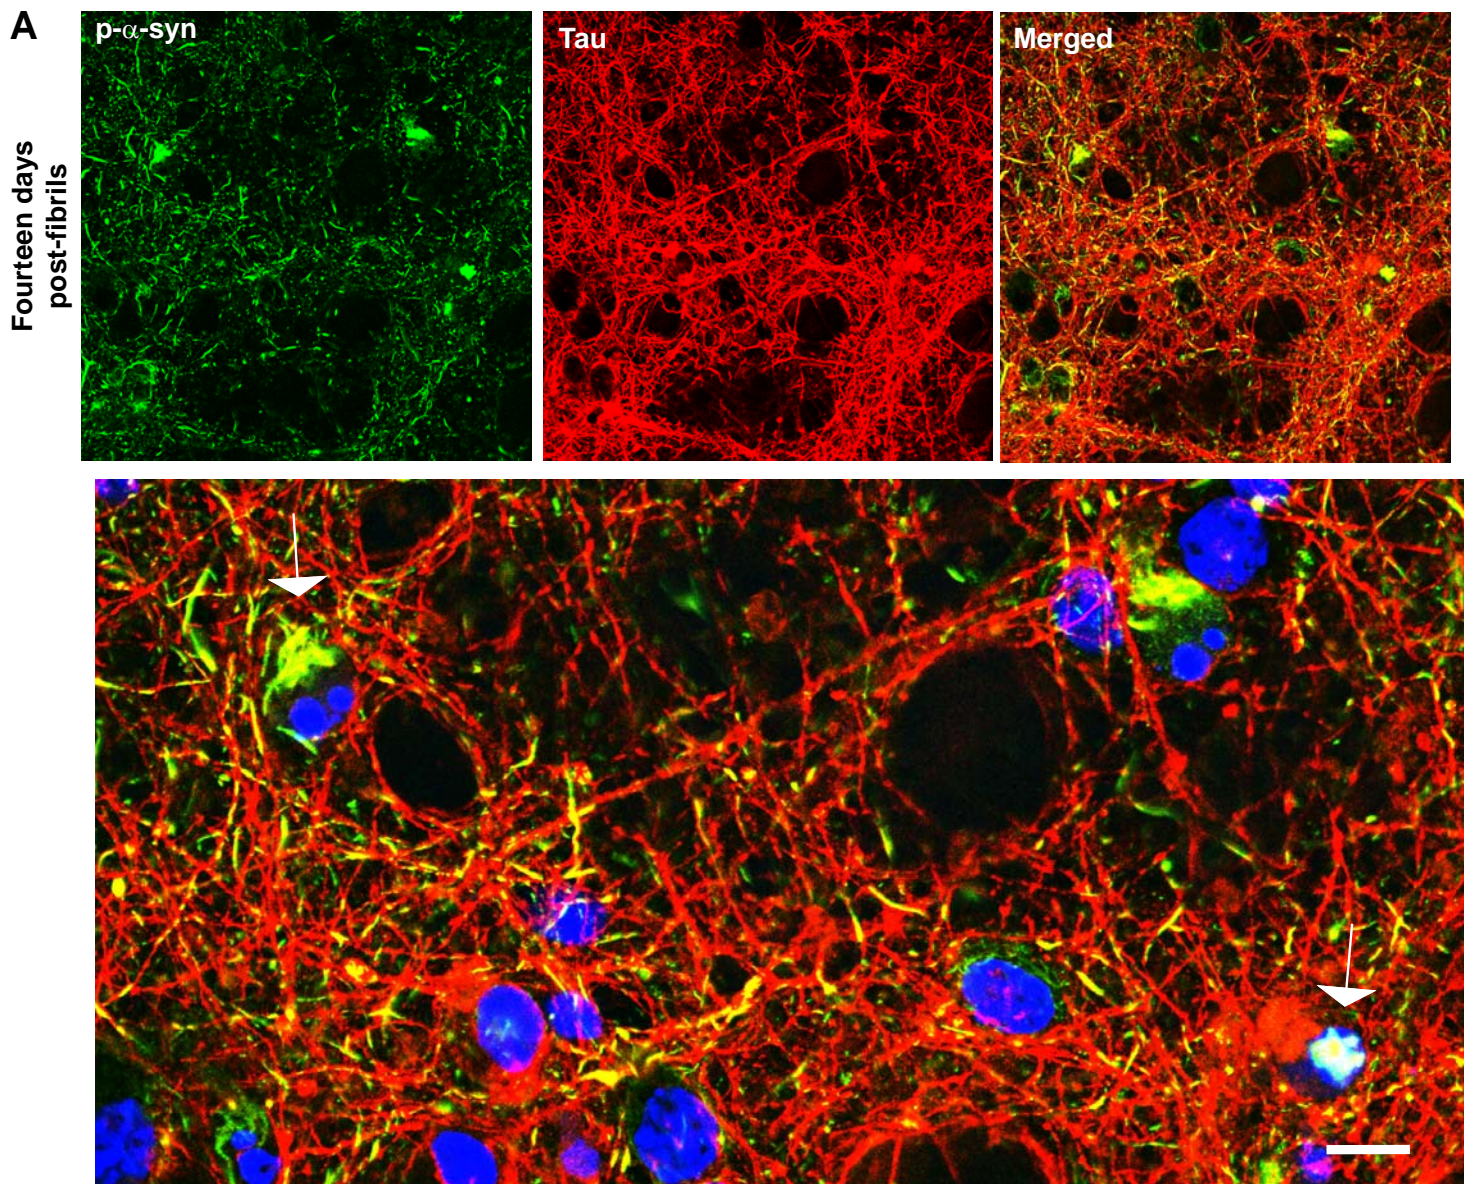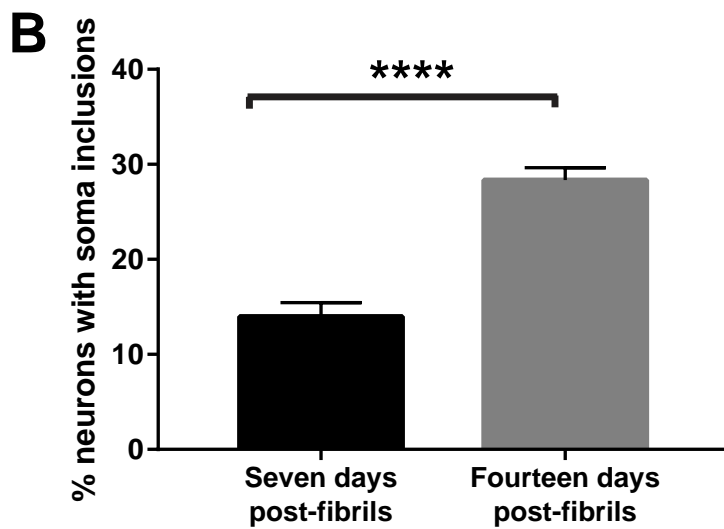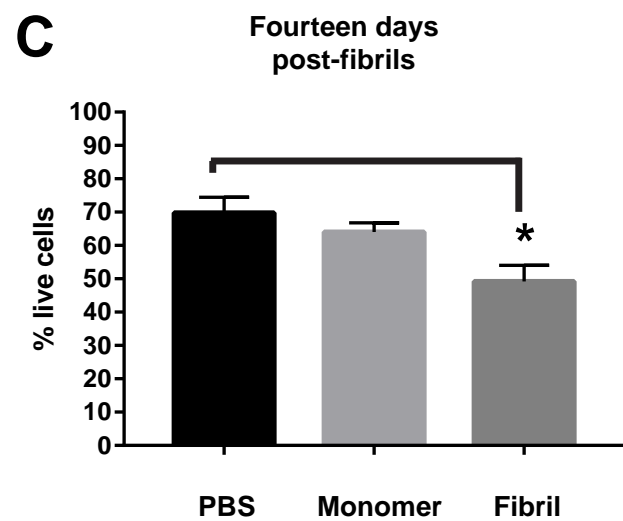

Additional file 2: Figure S2
